# Supplementary material
Source: publisher site journal article supplement (https://www.dovepress.com/article/257200)
Supplement: Supplementary file 1 [file get_supplementary_file.php]

S1\_Table :Univariate cox analysis on 1595 re-annotated lncRNA probes in the training cohort.

| prome_id     | lncRNA_Symbol | p           | HR          | Low.95.CI   | High.95.CI |
|--------------|---------------|-------------|-------------|-------------|------------|
| ILMN_3235196 | MIR1302-2HG   | 0.003370812 | 21.54570801 | 2.766699891 | 167.787455 |
| ILMN_3239576 | FAM138A       | 0.031844434 | 2.917253818 | 1.097436182 | 7.75477425 |
| ILMN_1860216 | AL627309.1    | 0.030625973 | 0.401185706 | 0.175283451 | 0.91822684 |
| ILMN_1711838 | AL627309.3    | 0.024661603 | 1.413457679 | 1.04514782  | 1.91155985 |
| ILMN_2083334 | AL627309.2    | 0.007668535 | 0.388455011 | 0.193853265 | 0.77840988 |
| ILMN_3206672 | AL627309.5    | 0.019978886 | 0.624213316 | 0.419690438 | 0.92840396 |
| ILMN_3235143 | AL627309.4    | 0.007410601 | 10.52412957 | 1.879397187 | 58.9323555 |
| ILMN_1744709 | AP006222.2    | 0.020000645 | 0.322722167 | 0.12445477  | 0.83684696 |
| ILMN_1741662 | AL732372.1    | 0.034743107 | 4.47148204  | 1.113358854 | 17.9584072 |
| ILMN_2174711 | AC114498.1    | 0.026320474 | 0.174487551 | 0.037392165 | 0.81423222 |
| ILMN_1759023 | AL669831.2    | 0.048111275 | 1.706903522 | 1.004452134 | 2.90060575 |
| ILMN_1864512 | LINC01409     | 0.005576871 | 39.06854903 | 2.9253746   | 521.762759 |
| ILMN_1911500 | FAM87B        | 0.034298306 | 6.513122428 | 1.148694363 | 36.9295481 |
| ILMN_1678842 | LINC01128     | 0.039074846 | 1.272926171 | 1.012170248 | 1.60085819 |
| ILMN_1859127 | LINC00115     | 0.018179274 | 2.101557645 | 1.13473297  | 3.89214436 |
| ILMN_1799015 | FAM41C        | 0.039209535 | 0.483368619 | 0.242201774 | 0.9646718  |
| ILMN_1665571 | AL645608.6    | 0.044502083 | 0.294950029 | 0.08964467  | 0.97044832 |
| ILMN_3192411 | AL645608.2    | 0.006698749 | 0.074805223 | 0.011480478 | 0.48742058 |
| ILMN_1732860 | AL645608.4    | 0.010549151 | 0.024118716 | 0.001388526 | 0.41894248 |
| ILMN_2155480 | LINC02593     | 0.003132033 | 4.685525625 | 1.68184074  | 13.0536441 |
| ILMN_1714176 | AL645608.7    | 0.003189456 | 49.1635616  | 3.69225131  | 654.629273 |
| ILMN_1726153 | AL645608.1    | 0.001019825 | 2.695369292 | 1.491742799 | 4.87015297 |
| ILMN_3241081 | AL645608.5    | 0.049404852 | 0.652774487 | 0.42658807  | 0.99888994 |
| ILMN_1735157 | AL645608.8    | 0.035774803 | 0.546132102 | 0.310493432 | 0.96060091 |
| ILMN_1784046 | AL390719.3    | 0.046261181 | 18.97634098 | 1.049999795 | 342.953893 |
| ILMN_1672795 | LINC01342     | 0.038753403 | 3.727054833 | 1.07036931  | 12.9777055 |
| ILMN_1796074 | AL390719.2    | 0.021646241 | 0.602462842 | 0.390941471 | 0.9284292  |
| ILMN_1864631 | TTLL10-AS1    | 0.00642408  | 0.103045674 | 0.020101562 | 0.52823809 |
| ILMN_1666924 | AL162741.1    | 0.032077077 | 1.976135445 | 1.060041053 | 3.68392459 |
| ILMN_1695485 | LINC01786     | 0.029685823 | 14.76948415 | 1.303922601 | 167.293413 |
| ILMN_2392370 | AL139287.1    | 0.006123738 | 0.386367681 | 0.195745891 | 0.7626213  |
| ILMN_1806779 | MRPL20-AS1    | 0.003367726 | 0.063681186 | 0.010104806 | 0.40132323 |
| ILMN_3273229 | AL391244.2    | 0.006576798 | 2.175351527 | 1.241922674 | 3.81034534 |
| ILMN_2363426 | AL391244.1    | 0.019250771 | 4.341038941 | 1.269686387 | 14.8419478 |
| ILMN_3241665 | LINC01770     | 0.019767445 | 0.354954828 | 0.148560676 | 0.84809072 |
| ILMN_1712944 | AL645728.1    | 0.047250953 | 0.572093464 | 0.32951678  | 0.99324511 |

|              |              |             |             |             |            |
|--------------|--------------|-------------|-------------|-------------|------------|
| ILMN_3261278 | AL691432.4   | 0.013599947 | 0.165804256 | 0.039787953 | 0.69093908 |
| ILMN_1656382 | AL691432.2   | 0.010026372 | 0.020918753 | 0.001101969 | 0.39710215 |
| ILMN_3237562 | FO704657.1   | 0.030347876 | 4.021189815 | 1.141213034 | 14.1691052 |
| ILMN_1690268 | AL031282.2   | 0.045148728 | 0.46850308  | 0.223122162 | 0.98374421 |
| ILMN_3282121 | AL391845.2   | 0.015256925 | 0.110598572 | 0.018675235 | 0.65498743 |
| ILMN_3188005 | AL391845.1   | 0.049504512 | 4.925342822 | 1.00346117  | 24.175327  |
| ILMN_1855430 | AL590822.2   | 0.030535209 | 3.322840057 | 1.119360287 | 9.86390724 |
| ILMN_1897279 | PRKCZ-AS1    | 0.044253155 | 20.91860778 | 1.081312632 | 404.682363 |
| ILMN_3255389 | AL590822.3   | 0.023485636 | 0.077732465 | 0.008527043 | 0.70860865 |
| ILMN_1759691 | AL589739.1   | 0.043418985 | 0.036503353 | 0.001469458 | 0.90679335 |
| ILMN_3231300 | AL513477.2   | 0.016831093 | 0.37985271  | 0.171761262 | 0.84005019 |
| ILMN_1863899 | AL139246.1   | 0.017152059 | 30.00888582 | 1.830059373 | 492.078695 |
| ILMN_3235718 | AL139246.4   | 0.048894727 | 0.316019634 | 0.100427485 | 0.99443303 |
| ILMN_1746309 | AL139246.5   | 0.033092606 | 0.345155676 | 0.129748096 | 0.91818257 |
| ILMN_1733103 | TNFRSF14-AS1 | 0.018760353 | 1.860303085 | 1.108583297 | 3.12175691 |
| ILMN_1848461 | AL139246.3   | 0.010690914 | 16.07749034 | 1.905735424 | 135.635667 |
| ILMN_1869348 | AL831784.1   | 0.032355094 | 0.024400734 | 0.000813709 | 0.73170605 |
| ILMN_3238143 | AC242022.2   | 0.035362686 | 14.76586996 | 1.202649009 | 181.292226 |
| ILMN_1866290 | AC242022.1   | 0.020607663 | 8.460117391 | 1.387580376 | 51.5815786 |
| ILMN_1791057 | AL592464.2   | 0.002452965 | 2.617964506 | 1.404497493 | 4.87985076 |
| ILMN_1762545 | AL592464.3   | 0.036124718 | 11.08205563 | 1.168356282 | 105.115159 |
| ILMN_1863185 | AL592464.1   | 0.03952338  | 0.409253277 | 0.174820595 | 0.95805786 |
| ILMN_3241729 | AL589702.1   | 0.016831399 | 5.828273793 | 1.373541816 | 24.7307909 |
| ILMN_1825712 | PRDM16-DT    | 0.024703089 | 0.021956552 | 0.000784053 | 0.61486971 |
| ILMN_1818577 | AL008733.1   | 0.010359111 | 0.161822094 | 0.040208724 | 0.65126142 |
| ILMN_3263099 | AL590438.1   | 0.045342032 | 2.869879973 | 1.022102643 | 8.05810562 |
| ILMN_1676990 | AL354743.2   | 0.022365723 | 0.076302561 | 0.008387959 | 0.69409979 |
| ILMN_1690870 | AL354743.1   | 0.041849222 | 0.034240148 | 0.001327756 | 0.88298422 |
| ILMN_1838767 | AL512413.1   | 0.005621066 | 0.622834144 | 0.445481627 | 0.8707932  |
| ILMN_2410965 | AL513320.1   | 0.041496684 | 0.503537101 | 0.260343776 | 0.97390311 |
| ILMN_1653039 | AL136528.1   | 0.014897104 | 0.540427605 | 0.329308535 | 0.88689471 |
| ILMN_1825421 | AL136528.2   | 0.023002702 | 0.031253551 | 0.00157508  | 0.62014901 |
| ILMN_1671703 | AL365330.1   | 0.019598382 | 1.362994239 | 1.050874683 | 1.7678162  |
| ILMN_1653047 | LINC01134    | 0.049324245 | 0.27616887  | 0.076560062 | 0.99620146 |
| ILMN_1848913 | LINC01346    | 0.036859666 | 0.117574791 | 0.01575253  | 0.8775626  |
| ILMN_1716259 | LINC01345    | 0.041710293 | 0.053463753 | 0.003190513 | 0.89589765 |
| ILMN_1737168 | LINC02780    | 0.002868222 | 0.02757342  | 0.002602043 | 0.29219096 |
| ILMN_1670452 | AL805961.1   | 0.020542397 | 0.335355559 | 0.13304695  | 0.84529071 |
| ILMN_2350801 | LINC01777    | 0.016948534 | 0.285300247 | 0.101907268 | 0.79872842 |
| ILMN_1804461 | AL355602.1   | 0.000660376 | 0.364040681 | 0.203507603 | 0.65120721 |
| ILMN_1684227 | Z98747.1     | 0.03941283  | 15.67223426 | 1.142758502 | 214.935112 |
| ILMN_1910645 | LINC01646    | 0.017351486 | 19.35526455 | 1.685519332 | 222.261625 |

|              |            |             |             |             |            |
|--------------|------------|-------------|-------------|-------------|------------|
| ILMN_1677997 | Z98886.1   | 0.005918047 | 3.757395021 | 1.463852899 | 9.64442353 |
| ILMN_3268403 | BX005132.1 | 0.039176226 | 0.382468002 | 0.153429466 | 0.95341382 |
| ILMN_1697544 | LINC02781  | 0.000727801 | 0.12193421  | 0.035976723 | 0.41326586 |
| ILMN_1906423 | LINC02782  | 0.02919571  | 2.273410087 | 1.086734629 | 4.75589282 |
| ILMN_1671800 | AL139823.1 | 0.009847799 | 0.49192583  | 0.287042028 | 0.84305084 |
| ILMN_1772522 | Z98259.3   | 0.021709358 | 0.311424147 | 0.115012712 | 0.84325461 |
| ILMN_1709204 | Z98259.2   | 0.0081387   | 2.509992449 | 1.269560529 | 4.962396   |
| ILMN_1871413 | Z98259.1   | 0.047711565 | 13.53415586 | 1.026617645 | 178.424144 |
| ILMN_1783204 | AL365255.1 | 0.011858126 | 0.017435555 | 0.000744215 | 0.40848212 |
| ILMN_1695829 | AL031847.1 | 0.028373294 | 4.793110006 | 1.180514213 | 19.4609292 |
| ILMN_1720433 | LINC00337  | 0.007136022 | 0.716153482 | 0.561537529 | 0.913342   |
| ILMN_1728403 | AL031848.2 | 0.013366698 | 0.159404503 | 0.037210261 | 0.68287067 |
| ILMN_1827283 | AL031848.1 | 0.040486782 | 0.27660983  | 0.080895107 | 0.94582975 |
| ILMN_1861128 | LINC01672  | 0.016213816 | 11.80801589 | 1.577840125 | 88.3671527 |
| ILMN_1676712 | AL591163.1 | 0.02622212  | 2.13470628  | 1.093847109 | 4.16600351 |
| ILMN_1696318 | CAMTA1-DT  | 0.012249288 | 0.524097967 | 0.316129098 | 0.86888136 |
| ILMN_1719139 | AL512330.1 | 0.030688161 | 12.08784149 | 1.261049727 | 115.868477 |
| ILMN_3230508 | CAMTA1-IT1 | 0.021687926 | 7.294417367 | 1.337325935 | 39.7872525 |
| ILMN_1734734 | Z97987.1   | 0.029791346 | 0.154005238 | 0.028488774 | 0.83252488 |
| ILMN_1770473 | AL365194.1 | 0.005172936 | 17.97040696 | 2.372176031 | 136.134723 |
| ILMN_3236695 | AL359881.3 | 0.027517095 | 0.030075319 | 0.001333468 | 0.67832502 |
| ILMN_3246060 | AL359881.2 | 0.005309208 | 3.244579533 | 1.418302183 | 7.42246361 |
| ILMN_2143383 | AL359881.1 | 0.009918446 | 0.025711705 | 0.001591174 | 0.41547416 |
| ILMN_1917095 | Z98884.2   | 0.01842637  | 7.939552405 | 1.417589253 | 44.4673887 |
| ILMN_1913537 | Z98884.1   | 0.030968464 | 10.34088561 | 1.238457678 | 86.3444242 |
| ILMN_3237991 | AL034417.4 | 0.036449328 | 1.43075436  | 1.022845473 | 2.00133656 |
| ILMN_3308936 | AL034417.3 | 0.0497668   | 13.30639213 | 1.002640514 | 176.593773 |
| ILMN_1676411 | AL034417.2 | 0.018811945 | 0.194458139 | 0.049601525 | 0.76235495 |
| ILMN_1908840 | LINC01714  | 0.037882535 | 9.498044386 | 1.134223921 | 79.5370698 |
| ILMN_1812043 | AL358876.2 | 0.030577347 | 20.15745109 | 1.324913703 | 306.678717 |
| ILMN_1701933 | RERE-AS1   | 0.044808187 | 0.702604469 | 0.497706499 | 0.99185572 |
| ILMN_1701966 | AL357552.2 | 0.042595007 | 0.20236348  | 0.043194633 | 0.94805708 |
| ILMN_1880113 | ENO1-AS1   | 0.015378476 | 20.23193898 | 1.777186024 | 230.325554 |
| ILMN_1774974 | MIR34AHG   | 0.012698608 | 0.322994949 | 0.132798847 | 0.78559219 |
| ILMN_1867134 | LNCTAM34A  | 0.006291038 | 0.033616916 | 0.002948346 | 0.38329871 |
| ILMN_3281342 | BX323043.1 | 0.025738777 | 0.256435241 | 0.077545058 | 0.84801062 |
| ILMN_1729421 | LINC02606  | 0.025720329 | 18.49742186 | 1.4244314   | 240.204348 |
| ILMN_3301334 | AL928921.1 | 0.016320777 | 0.045973379 | 0.003723883 | 0.56756664 |
| ILMN_1863592 | PIK3CD-AS1 | 0.001578482 | 6.981920687 | 2.091617307 | 23.3059921 |
| ILMN_1849285 | PIK3CD-AS2 | 0.043924775 | 14.81576439 | 1.076137163 | 203.97667  |
| ILMN_1653801 | AL357140.1 | 0.013405581 | 18.62944599 | 1.834135516 | 189.220619 |
| ILMN_1674782 | AL357140.4 | 0.011075325 | 1.496057324 | 1.096397238 | 2.041402   |

|              |            |             |             |             |            |
|--------------|------------|-------------|-------------|-------------|------------|
| ILMN_3308828 | AL357140.2 | 0.026472688 | 0.057800466 | 0.004661127 | 0.71675673 |
| ILMN_1906299 | AL603962.1 | 0.001364655 | 16.64860546 | 2.976943463 | 93.1076009 |

S2\_Table :The significant identified 37 probes

| symbol       | p.value     | HR          | Low 95%CI   | High 95%CI |
|--------------|-------------|-------------|-------------|------------|
| ILMN_3235196 | 3.59E-05    | 1598.167014 | 48.33579972 | 52841.534  |
| ILMN_1860216 | 0.046987319 | 0.306872567 | 0.095663804 | 0.98439293 |
| ILMN_1759023 | 0.027268973 | 2.503789498 | 1.108459372 | 5.65556304 |
| ILMN_1864512 | 0.035041767 | 45.43374268 | 1.307072493 | 1579.27352 |
| ILMN_1799015 | 0.003517674 | 0.198164873 | 0.066823191 | 0.58766001 |
| ILMN_3192411 | 0.02960716  | 0.037565599 | 0.001952846 | 0.72262449 |
| ILMN_1732860 | 0.033859807 | 0.009245598 | 0.000122168 | 0.69969914 |
| ILMN_1726153 | 0.021195316 | 2.732449643 | 1.162157485 | 6.42450025 |
| ILMN_1672795 | 0.020824145 | 10.86666809 | 1.436947219 | 82.1773227 |
| ILMN_3241665 | 0.034499254 | 0.228351935 | 0.058076071 | 0.89786732 |
| ILMN_1897279 | 0.030344434 | 125.0387337 | 1.58159659  | 9885.38104 |
| ILMN_3255389 | 0.032165609 | 0.025532599 | 0.000890835 | 0.73180034 |
| ILMN_1863899 | 0.034086372 | 94.76915175 | 1.407328221 | 6381.73241 |
| ILMN_1791057 | 0.000429311 | 6.984763414 | 2.367582695 | 20.6062158 |
| ILMN_3241729 | 1.14E-05    | 477.7672151 | 30.38343431 | 7512.69621 |
| ILMN_1825712 | 0.005183259 | 0.000530683 | 2.68E-06    | 0.10499434 |
| ILMN_1676990 | 0.041485643 | 0.030942032 | 0.001094847 | 0.87446881 |
| ILMN_1838767 | 0.030727876 | 0.563413798 | 0.334804457 | 0.94812091 |
| ILMN_1653047 | 0.012025309 | 0.107228519 | 0.018773215 | 0.61246595 |
| ILMN_1670452 | 0.024871009 | 0.215659146 | 0.056455865 | 0.82380932 |
| ILMN_1804461 | 0.012395768 | 0.317369549 | 0.1290936   | 0.78023566 |
| ILMN_1677997 | 0.001669212 | 12.95109084 | 2.6229722   | 63.9468287 |
| ILMN_1697544 | 0.022175421 | 0.135390722 | 0.024404644 | 0.75111309 |
| ILMN_1906423 | 0.0120521   | 5.488342205 | 1.452717045 | 20.7348708 |
| ILMN_1671800 | 0.0321299   | 0.406810686 | 0.17869486  | 0.92613147 |
| ILMN_1709204 | 0.010550491 | 3.854131318 | 1.370412997 | 10.8393077 |
| ILMN_1861128 | 0.036676487 | 25.39046473 | 1.221755906 | 527.663256 |
| ILMN_1913537 | 0.008792082 | 90.30604531 | 3.109623117 | 2622.56277 |
| ILMN_1812043 | 0.011899172 | 188.0830724 | 3.176959917 | 11134.935  |
| ILMN_1880113 | 0.006016121 | 141.8364377 | 4.134739974 | 4865.49945 |
| ILMN_1867134 | 0.023293731 | 0.020203793 | 0.000694057 | 0.58812647 |
| ILMN_3281342 | 0.038343375 | 0.164089037 | 0.02966891  | 0.9075228  |
| ILMN_1729421 | 0.00892141  | 151.831912  | 3.519212402 | 6550.59339 |
| ILMN_1863592 | 0.013426122 | 9.667664023 | 1.600208482 | 58.4072192 |
| ILMN_1653801 | 0.001964042 | 136.3751747 | 6.069393571 | 3064.25808 |
| ILMN_3308828 | 0.003320569 | 0.00237944  | 4.22E-05    | 0.13415592 |
| ILMN_1906299 | 0.000771302 | 106.1584326 | 7.001420458 | 1609.61806 |
